# Supplementary figures and images for: Extended follow-up and impact of high-risk prognostic factors from the phase 3 RESONATE study in patients with previously treated CLL/SLL
Source: PubMed Central journal article supplement — Leukemia. 2017 Jul 21;32(1):83–91. doi: 10.1038/leu.2017.175 (PMC5770586; doi:10.1038/leu.2017.175), 2017-07-21

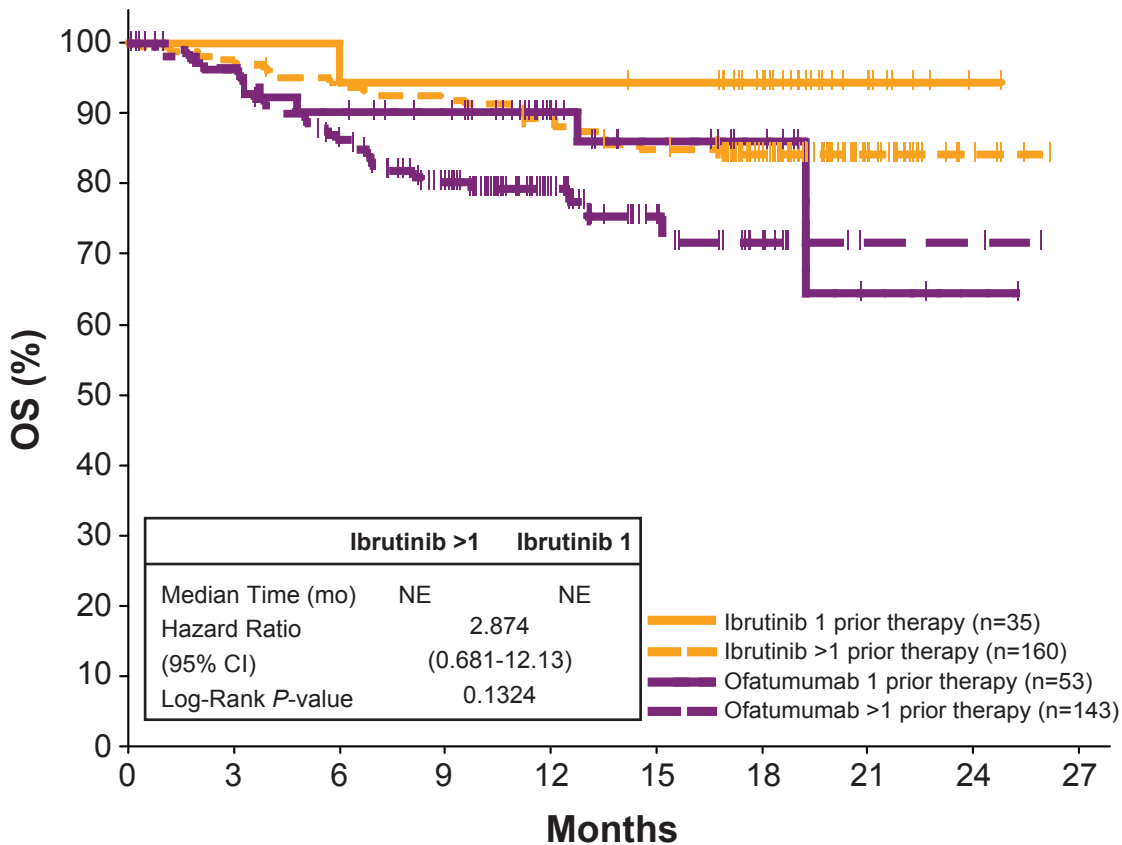

Supplement: leu2017175x10.pdf [file leu2017175x10.pdf]
